# Supplementary material for: Three-Component Repurposed Technology for Enhanced Expression: Highly Accumulable Transcriptional Activators via Branched Tag Arrays
Source: PubMed Central journal article supplement (PMC6636879; doi:10.1089/crispr.2018.0009), 2018-10-23
Supplement: Supp_Fig2.pdf [file Supp_Fig2.pdf]

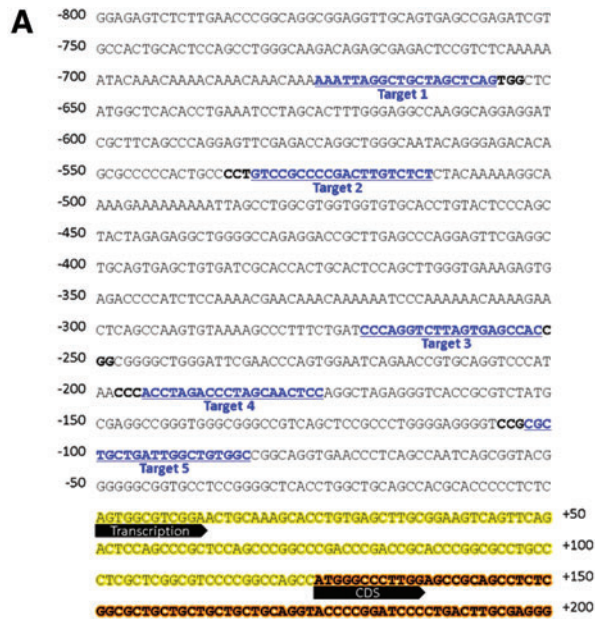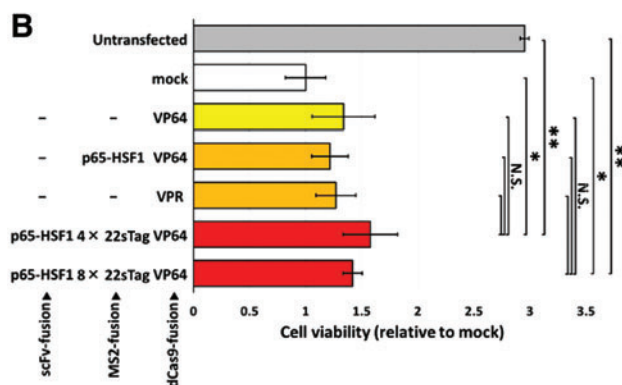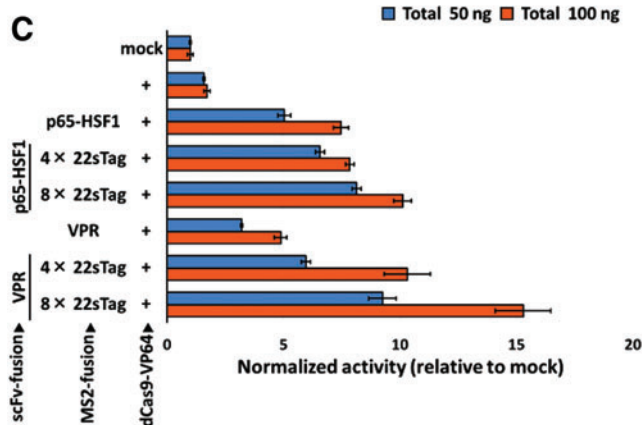

**SUPPLEMENTARY FIG. S2.** Supplemental data of *CDH1* activation and cytotoxicity analysis in MIA-PaCa2 cells. **(A)** Detailed design of sgRNAs used for the activation of *CDH1*, related to Figures 2A and B. **(B)** Viability of the cells transfected with the vectors shown at the left. Data are shown as the mean  $\pm$  S.D. ( $n=4$ ). **(C)** Dose response of the vectors transfected (50 ng vs. 100 ng in total), related to Figure 2E. Data are shown as the mean  $\pm$  S.D. ( $n=4$ ). N.S., not significant.
