# Supplementary material for: Three-Component Repurposed Technology for Enhanced Expression: Highly Accumulable Transcriptional Activators via Branched Tag Arrays
Source: PubMed Central journal article supplement (PMC6636879; doi:10.1089/crispr.2018.0009), 2018-10-23
Supplement: Supp_Fig3.pdf [file Supp_Fig3.pdf]

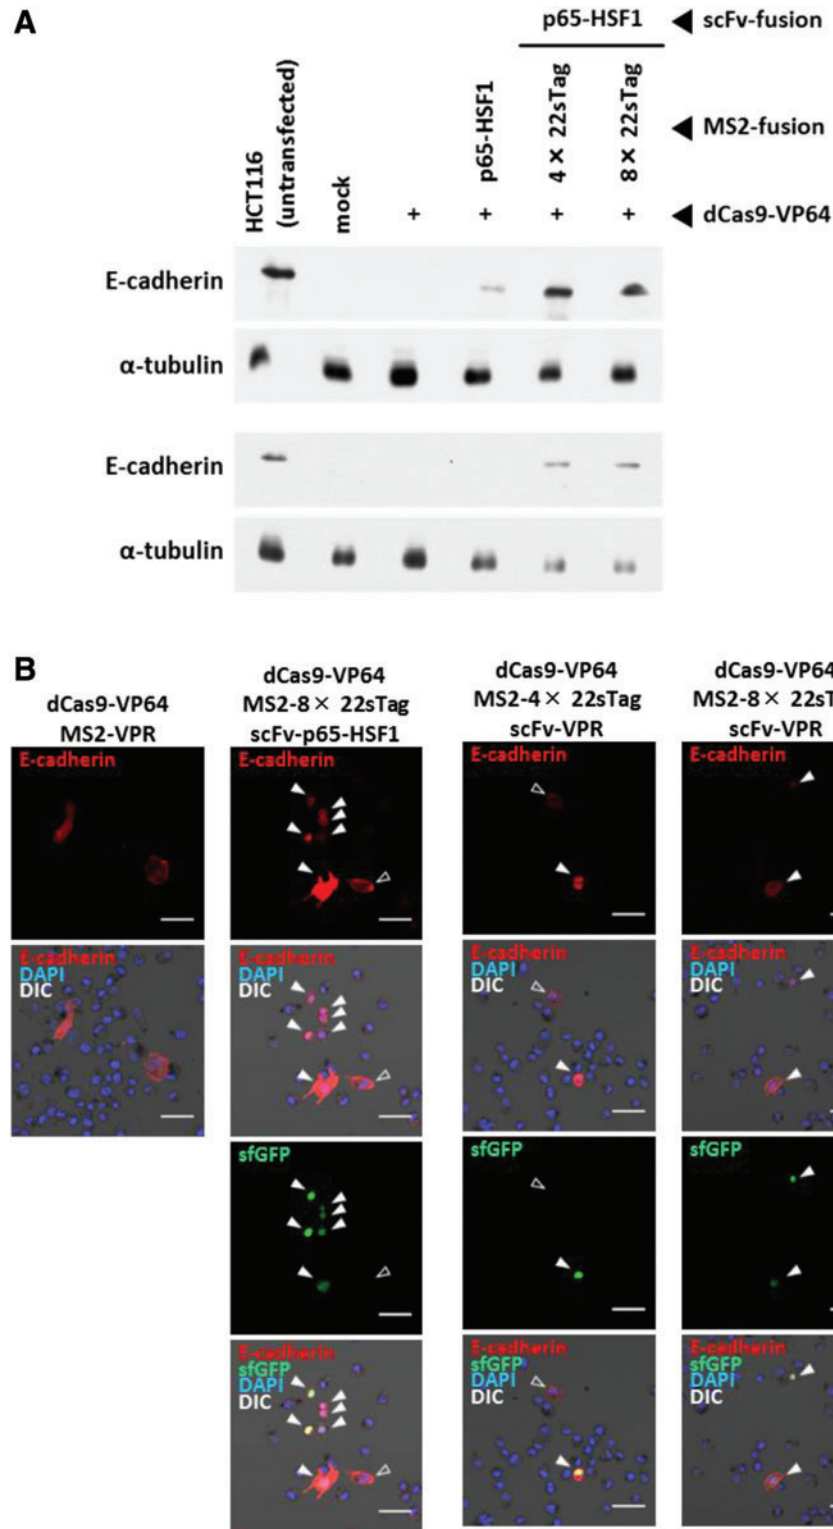

**SUPPLEMENTARY FIG. S3.** Supplemental data of E-cadherin protein expression. **(A)** Blots for the detection of E-cadherin and  $\alpha$ -tubulin proteins not shown in Figure 2G. Loaded protein mass is the same as Figure 2G. **(B)** Additional fluorescence images obtained in the immunostaining experiments not shown in Figure 2H. Filled and open triangles indicate E-cadherin/sfGFP- and E-cadherin-positive cells. Scale bars, 50  $\mu$ m.
